# Supplementary material for: Monascus-fermented quinoa alleviates hyperlipidemia in mice by regulating the amino acid metabolism pathway
Source: Royal Society of Chemistry journal article supplement (doi:10.1039/d4fo00930d), 2024-01-01
Supplement: d4fo00930d1.pdf [file d4fo00930d1.pdf]

PHENYLALANINE METABOLISM

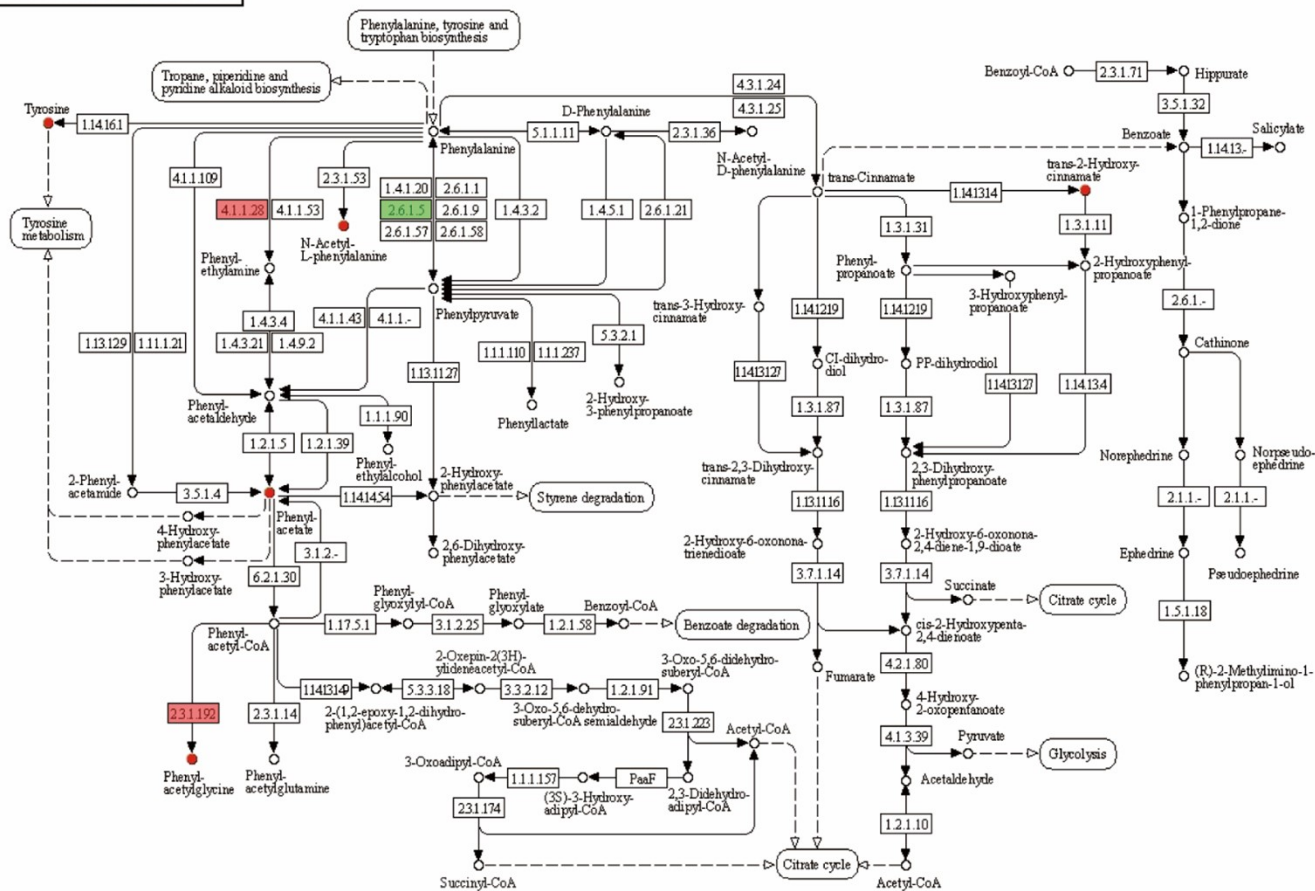

**Fig. S1 Phenylalanine metabolism pathway.** Red circles/boxes indicate upregulation of the metabolites/genes, while green circles/boxes indicate downregulation of the metabolites/genes.





**AMPK SIGNALING PATHWAY**

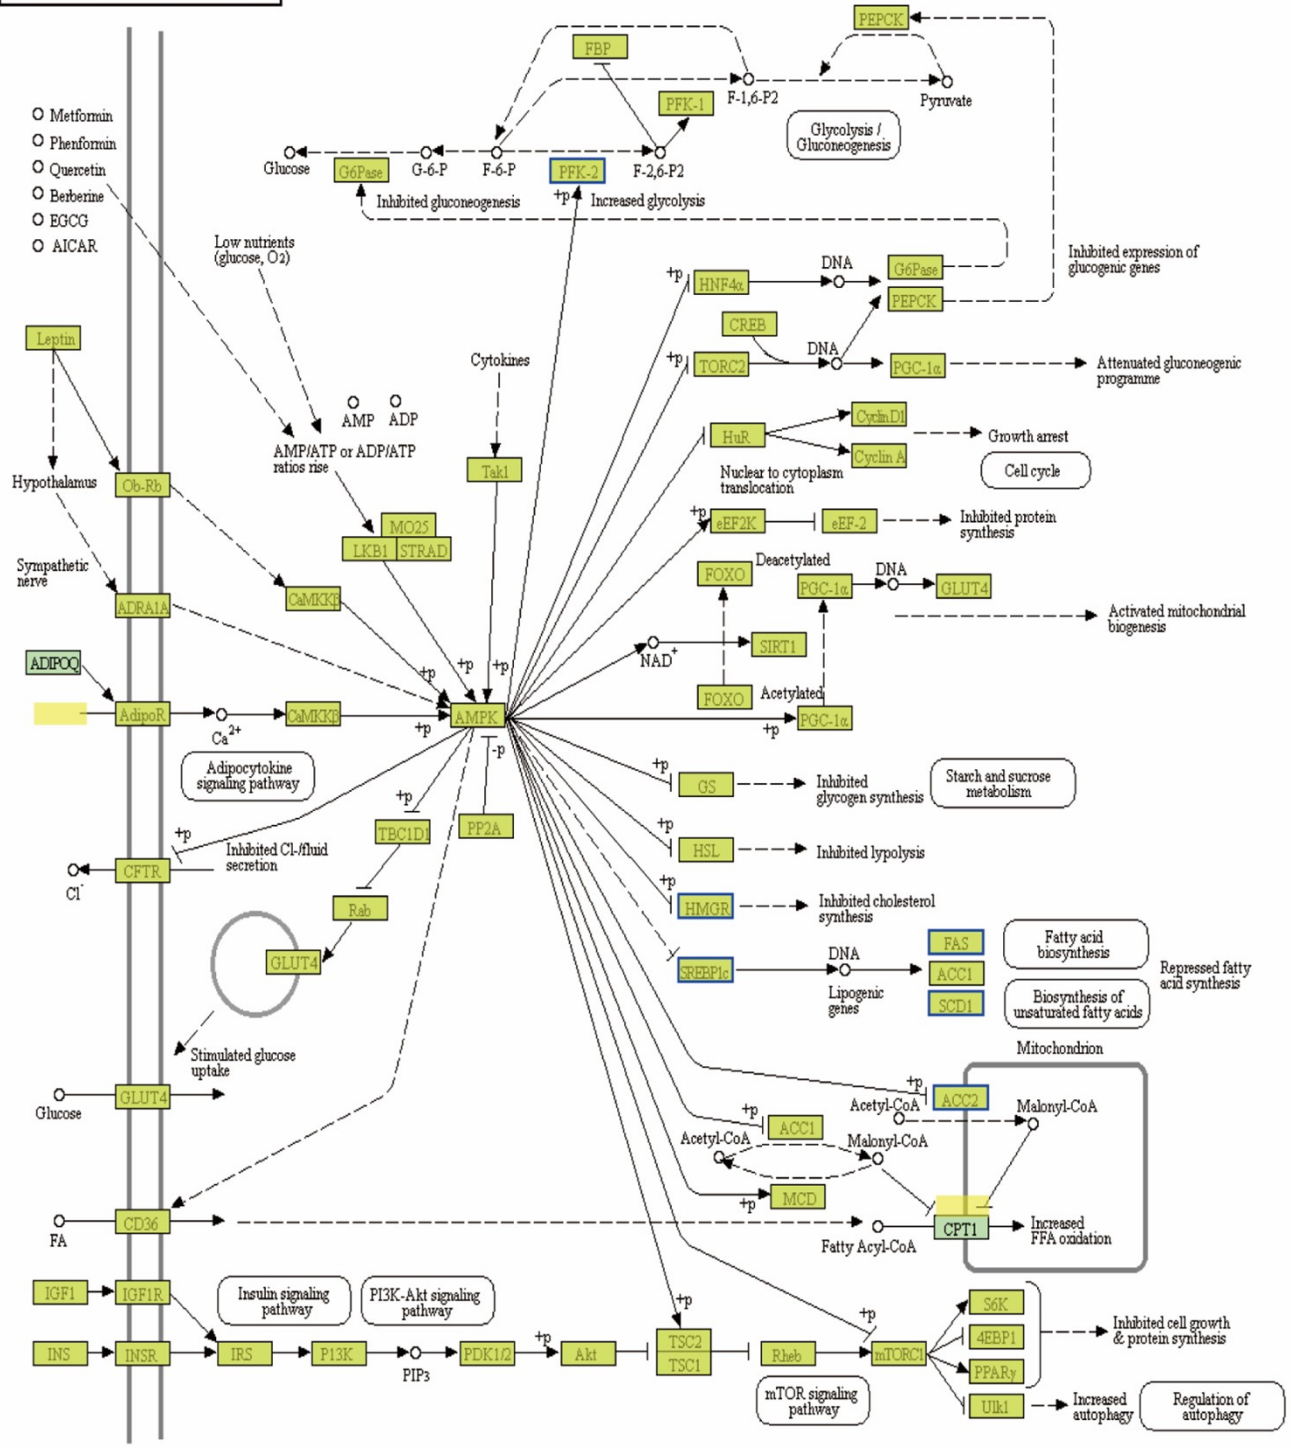

**Fig. S4 AMPK signaling pathway.** Blue boxes indicate downregulation of the genes.

AMINOACYL-tRNA BIOSYNTHESIS

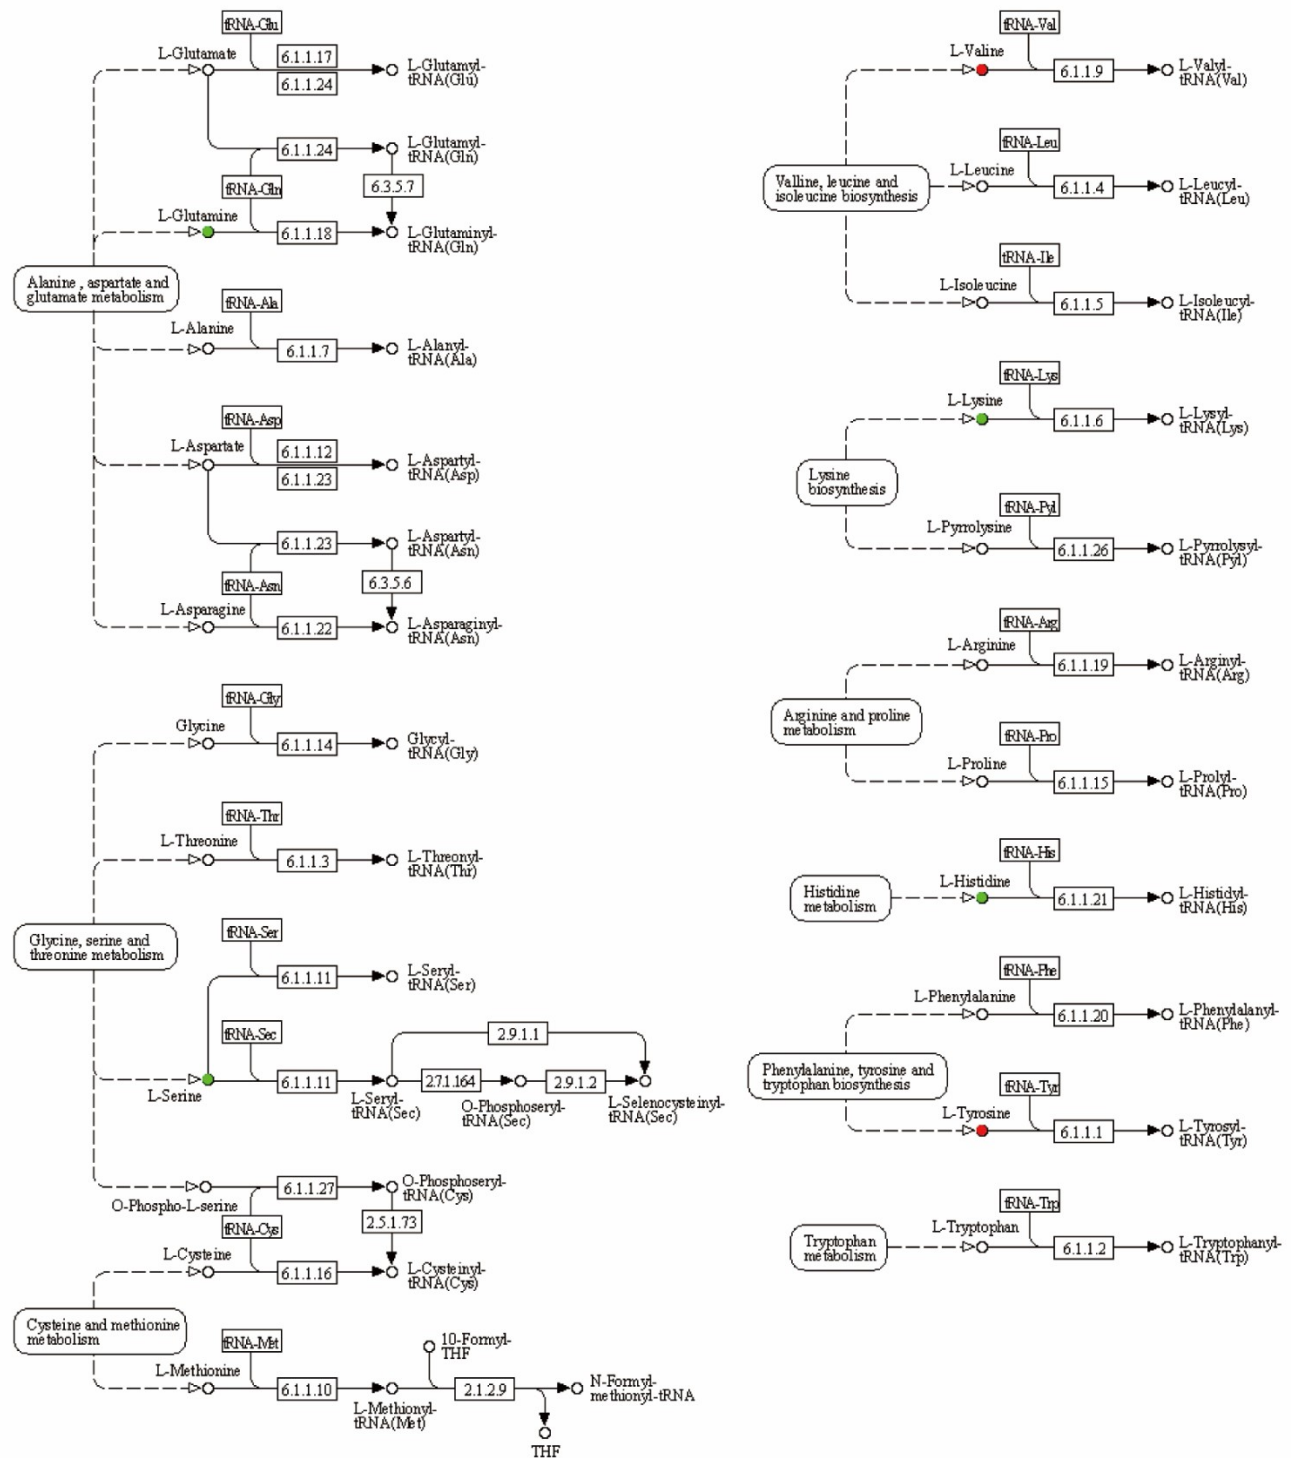

**Fig. S5 Aminoacyl-tRNA biosynthesis pathway.** Red circles indicate upregulation of the metabolites, while green circles indicate downregulation of the metabolites.



**Table S1 Primers for qRT-PCR validation of differential gene expression levels in mouse liver**

| Genes         | Primers  | Primer sequence (5'-3') |
|---------------|----------|-------------------------|
| <i>Ehhadh</i> | Ehhadh-F | ATGTGGGTTGGAAAGTTCGC    |
|               | Ehhadh-R | ACCAGCCCTTACCTGTCTTC    |
| <i>Ddc</i>    | Ddc-F    | CTACTGGCTGCTCGGACTAA    |
|               | Ddc-R    | GGAATGCGCCTGATCAGATG    |
| <i>Gm4952</i> | Gm4952-F | TGCTCCATTTGCGAAGTTCA    |
|               | Gm4952-R | GGTTTCCCTGGTTCATGTGG    |
| <i>Tat</i>    | Tat-F    | CAATCCCATCCGAGCCATTG    |
|               | Tat-R    | CTTGGGTCACTTCAGGGTCT    |
| <i>Acmsd</i>  | Acmsd-F  | TTCTCTGTTCGTGCATCCCT    |
|               | Acmsd-R  | AACACCCCACCCATGATCAT    |
| <i>Hmgcr</i>  | Hmgcr-F  | AGTGGGAACTATTGCACCGA    |
|               | Hmgcr-R  | ACACCTCTCTCACCACCTTG    |
| <i>Pfkfb3</i> | Pfkfb-F  | TGACTCGCTACCTCAACTGG    |
|               | Pfkfb-R  | AAGGCACACTGTTTTTCGGAC   |
| <i>Srebf1</i> | Srebf-F  | GCAGTGGTGGTAGTACTCT     |
|               | Srebf-R  | AGGATTGCAGGTCAGACACA    |
| <i>Fasn</i>   | Fasn-F   | GCTTCGCCAACTCTACCATG    |
|               | Fasn-R   | CCATCGCTTCCAGGACAATG    |
| <i>Scd1</i>   | Scd1-F   | CGAGAGAAGGTGAAGACGGT    |
|               | Scd1-R   | GCAGCAGGACCATGAGAATG    |

|                |           |                        |
|----------------|-----------|------------------------|
| <i>Acacb</i>   | Acacb-F   | AGAGGCCGAGAACACAAGAA   |
|                | Acacb-R   | GGATGGAGCGCATACTTG     |
| <i>β-Actin</i> | β-actin-F | TGTCCACCTTCCAGCAGATGT  |
|                | β-actin-R | AGCTCAGTAACAGTCCGCCTAG |

**Table S2 The blood lipid indices and body weight in mice.**

| Group | T C (mmol/L)           | TG (mmol/L)            | HDL-C (mmol/L)         | LDL-C (mmol/L)         | body weight (g)         |
|-------|------------------------|------------------------|------------------------|------------------------|-------------------------|
| ND    | 2.44±0.34 <sup>b</sup> | 0.98±0.17 <sup>b</sup> | 2.68±0.28 <sup>a</sup> | 0.63±0.04 <sup>a</sup> | 42.77±1.69 <sup>b</sup> |
| HFD   | 3.81±0.62 <sup>a</sup> | 1.32±0.24 <sup>a</sup> | 2.92±0.37 <sup>a</sup> | 0.77±0.22 <sup>a</sup> | 47.76±2.35 <sup>a</sup> |

Note: The data in the table are the mean ± standard deviation, and the different superscripts in the same column indicate significant differences ( $p < 0.05$ ).

**Table S3 The detection results of RNA samples.**

| Samples | Concentration (ng/ $\mu$ L) | Total amount ( $\mu$ g) | RQN   | Quality testing results |
|---------|-----------------------------|-------------------------|-------|-------------------------|
| ND1     | 1870.70                     | 65.47                   | 9.80  | A                       |
| ND2     | 2258.60                     | 79.05                   | 9.90  | A                       |
| ND3     | 1076.10                     | 37.66                   | 9.90  | A                       |
| ND4     | 2457.30                     | 86.01                   | 9.90  | A                       |
| HFD1    | 2201.30                     | 77.05                   | 9.90  | A                       |
| HFD2    | 1967.70                     | 68.87                   | 10.00 | A                       |
| HFD3    | 2151.50                     | 75.30                   | 9.90  | A                       |
| HFD4    | 2035.00                     | 71.23                   | 10.00 | A                       |
| LOV1    | 1373.80                     | 116.77                  | 10.00 | A                       |
| LOV2    | 2306.10                     | 80.71                   | 10.00 | A                       |
| LOV3    | 2418.70                     | 84.65                   | 9.90  | A                       |
| LOV4    | 1843.30                     | 64.52                   | 10.00 | A                       |
| MFQ1    | 1341.60                     | 46.96                   | 9.90  | A                       |
| MFQ2    | 1531.50                     | 53.60                   | 9.90  | A                       |
| MFQ3    | 1973.00                     | 69.06                   | 10.00 | A                       |
| MFQ4    | 2181.60                     | 76.36                   | 9.80  | A                       |

RQN: RNA Quality Number.
